# Supplementary material for: Vitamin D Metabolites in Nonmetastatic High-Risk Prostate Cancer Patients with and without Zoledronic Acid Treatment after Prostatectomy
Source: MDPI journal article supplement (doi:10.3390/cancers14061560), 2022-03-18
Supplement: s1 [file s1]

# Supplementary Materials: Vitamin D Metabolites in Nonmetastatic High-Risk Prostate Cancer Patients with and without Zoledronic Acid Treatment after Prostatectomy

Carsten Stephan, Bernhard Ralla, Florian Bonn, Max Diesner, Michael Lein and Klaus Jung

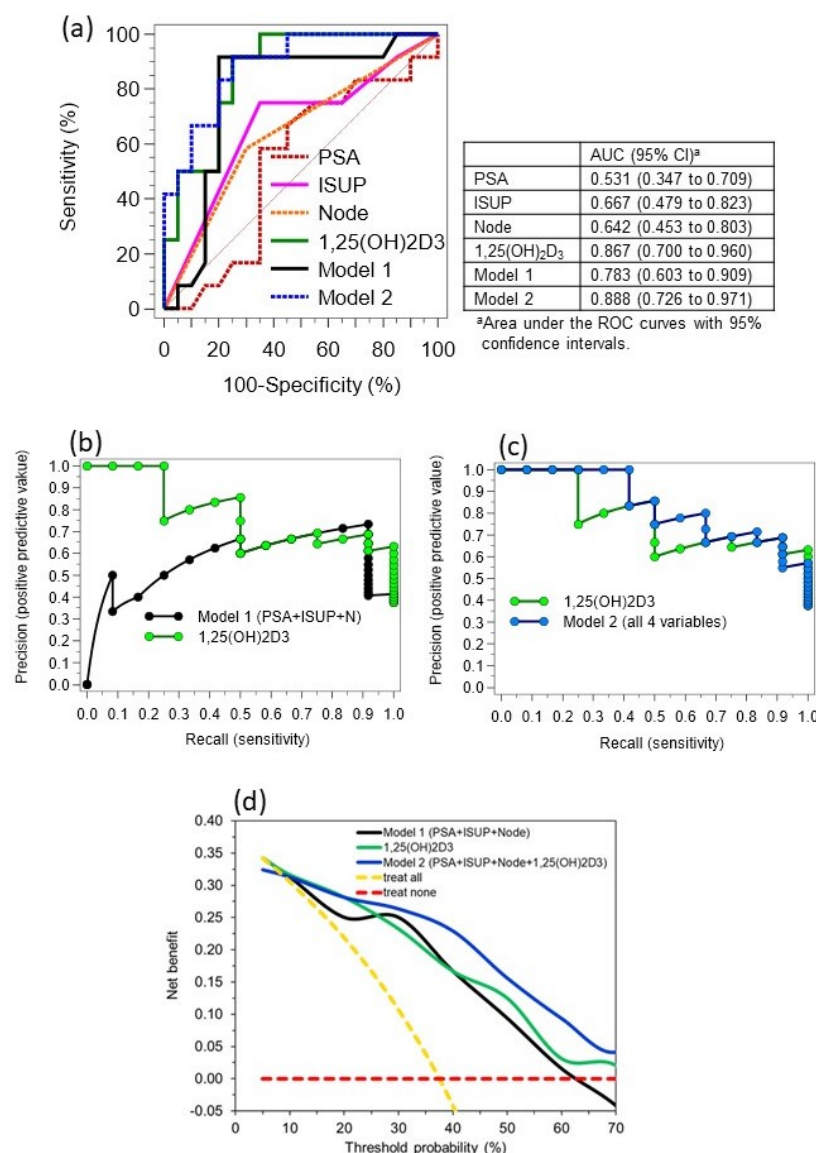

**Figure S1.** 1,25(OH)<sub>2</sub>D<sub>3</sub> level as prognostic indicator of subsequent bone metastasis after radical prostatectomy. **(a)** Receiver-operating characteristic curve analysis (ROC), **(b,c)** Precision-recall curve analysis, and **(d)** Decision-curve analysis. The prognostic validity of 1,25(OH)<sub>2</sub>D<sub>3</sub> is indicated as single marker in comparison with the separate clinico-pathological factors prostate-specific antigen (PSA), Gleason scores as ISUP grade groups, and the Node (N) status as well as with the combination of these three variables (Model 1, calculated by binary logistic regression). Model 2 is based on all four variables (PSA, ISUP grade, Node status, and 1,25(OH)<sub>2</sub>D<sub>3</sub>).

**Table S1.** Clinicopathological risk factors of the study patients with and without zoledronic acid treatment and subsequent metastasis.

| Pat_ID | PSA at diagnosis (µg/L) | Gleason score 1 + Gleason score 2 | Node positive disease | Numer of risk factors | PSA before study entry (µg/L) | ZA treatment | Subsequent metastasis |
|--------|-------------------------|-----------------------------------|-----------------------|-----------------------|-------------------------------|--------------|-----------------------|
| D001   | 4                       | 4+5                               | No                    | 1                     | <0.03                         | No           | No                    |
| D002   | 6                       | 4+5                               | No                    | 1                     | <0.03                         | No           | No                    |
| D003   | 28                      | 3+4                               | Yes                   | 2                     | 0.04                          | Yes          | No                    |
| D004   | 22                      | 4+3                               | No                    | 1                     | 1.26                          | No           | Yes                   |
| D005   | 18                      | 5+4                               | Yes                   | 2                     | 0.07                          | No           | No                    |
| D006   | 15                      | 4+4                               | No                    | 1                     | 0                             | No           | No                    |
| D007   | 19                      | 4+5                               | Yes                   | 2                     | 9.99                          | Yes          | No                    |
| D008   | 7                       | 4+5                               | No                    | 1                     | 0.47                          | Yes          | Yes                   |
| D009   | 25                      | 5+4                               | No                    | 2                     | 0.17                          | Yes          | No                    |
| D010   | 13                      | 4+5                               | No                    | 1                     | 0.11                          | Yes          | Yes                   |
| D011   | 31                      | 4+3                               | No                    | 1                     | 0.18                          | Yes          | No                    |
| D012   | 7                       | 3+5                               | No                    | 1                     | 0                             | No           | No                    |
| D013   | 18                      | 4+4                               | No                    | 1                     | 0.03                          | Yes          | No                    |
| D014   | 18                      | 4+5                               | Yes                   | 2                     | 0.89                          | No           | Yes                   |
| D015   | 141                     | 3+4                               | Yes                   | 2                     | 1.12                          | Yes          | Yes                   |
| D016   | 49                      | 4+5                               | Yes                   | 3                     | 0.88                          | No           | No                    |
| D017   | 21                      | 4+4                               | NA                    | 2                     | 0.03                          | No           | No                    |
| D018   | 33                      | 3+4                               | No                    | 1                     | 2.4                           | No           | No                    |
| D019   | 13                      | 5+4                               | No                    | 1                     | 0.29                          | No           | Yes                   |
| D020   | 5                       | 4+5                               | Yes                   | 2                     | 5.1                           | No           | Yes                   |
| D021   | 51                      | 4+3                               | No                    | 1                     | <0.1                          | No           | No                    |
| D022   | 15                      | 3+4                               | Yes                   | 1                     | 0.8                           | No           | No                    |
| D023   | 22                      | 3+3                               | No                    | 1                     | 21.5                          | Yes          | No                    |
| D024   | 17                      | 5+4                               | No                    | 1                     | 1.5                           | No           | Yes                   |
| D025   | 47                      | 4+3                               | Yes                   | 2                     | 0.25                          | Yes          | Yes                   |
| D026   | 13                      | 4+5                               | Yes                   | 2                     | 0.41                          | Yes          | Yes                   |
| D027   | 3                       | 4+5                               | No                    | 1                     | <0.04                         | Yes          | No                    |
| D028   | 5                       | 4+4                               | No                    | 1                     | 0.04                          | Yes          | No                    |
| D029   | 9                       | 3+4                               | Yes                   | 1                     | <0.002                        | Yes          | No                    |
| D030   | 9                       | 4+4                               | No                    | 1                     | ND                            | Yes          | No                    |
| D031   | 14                      | 4+5                               | Yes                   | 2                     | 0.019                         | Yes          | Yes                   |
| D032   | 10                      | 4+5                               | Yes                   | 2                     | 0.4                           | Yes          | Yes                   |

NA = not available, regional lymph nodes could not be assessed. ND = not determined. ZA treatment = Yes, patients treated with zoledronic acid; No, patients who did not receive zoledronic acid.
